# Supplementary material for: Designed Mini Protein 20 Mimicking Uricase Encapsulated in ZIF-8 as Nanozyme Biosensor for Uric Acid Detection
Source: Nanomaterials (Basel). 2022 Jul 4;12(13):2290. doi: 10.3390/nano12132290 (PMC9267977; doi:10.3390/nano12132290)
Supplement: Supplementary file 1 [file nanomaterials-12-02290-s001.zip › nanomaterials-1787296-supplementary.pdf]

# Designed Mini Protein 20 Mimicking Uricase Encapsulated in ZIF-8 as Nanozyme Biosensor for Uric Acid Detection

Siti Fatimah Nur Abdul Aziz <sup>1</sup>, Abu Bakar Salleh <sup>2</sup>, Siti Efliza Ashari <sup>3</sup>, Yahaya M. Normi <sup>2,4,5</sup>, Nor Azah Yusof <sup>1,4</sup> and Shahrul Ainliah Alang Ahmad <sup>1,4,\*</sup>

<sup>1</sup> Department of Chemistry, Faculty of Science, Universiti Putra Malaysia, Serdang 43400, Selangor, Malaysia; fatimahnur\_siti@yahoo.com (S.F.N.A.A.); azahy@upm.edu.my (N.A.Y.)

<sup>2</sup> Enzyme and Microbial Technology Research Centre (EMTech), Faculty of Biotechnology and Biomolecular Sciences, Universiti Putra Malaysia (UPM), Serdang 43400, Selangor, Malaysia; abubakar@upm.edu.my (A.B.S.); normi\_yahaya@upm.edu.my (Y.M.N.)

<sup>3</sup> Center of Foundation Studies for Agricultural Science, Universiti Putra Malaysia, Serdang 43400, Selangor, Malaysia; ct\_efliza@upm.edu.my

<sup>4</sup> Institute of Nanoscience and Nanotechnology (ION2), Universiti Putra Malaysia, 43400 Serdang, 43400, Selangor, Malaysia

<sup>5</sup> Department of Cell and Molecular Biology, Faculty of Biotechnology and Biomolecular Sciences, Universiti Putra Malaysia, Serdang 43400, Selangor, Malaysia

\* Correspondence: ainliah@upm.edu.my

**Table S1.** Central composite design (CCD) for the optimization of uric acid detection by mp20@ZIF-8/rGO/SPCE using the RSM method and results of the current response.

| Standard | A: pH | B: Deposition Potential (V) | C: Deposition Time (s) | Peak Current (μA) |           |
|----------|-------|-----------------------------|------------------------|-------------------|-----------|
|          |       |                             |                        | Experimental      | Predicted |
| 1        | 5.4   | -0.50                       | 30.00                  | 4.87              | 4.84      |
| 2        | 9.4   | -0.50                       | 30.00                  | 3.62              | 3.63      |
| 3        | 5.4   | -0.10                       | 30.00                  | 4.72              | 4.74      |
| 4        | 9.4   | -0.10                       | 30.00                  | 3.22              | 3.20      |
| 5        | 5.4   | -0.50                       | 210.00                 | 3.32              | 3.34      |
| 6        | 9.4   | -0.50                       | 210.00                 | 4.01              | 3.99      |
| 7        | 5.4   | -0.10                       | 210.00                 | 3.06              | 3.05      |
| 8        | 9.4   | -0.10                       | 210.00                 | 3.34              | 3.37      |
| 11       | 7.4   | -0.50                       | 120.00                 | 5.34              | 5.37      |
| 12       | 7.4   | -0.10                       | 120.00                 | 5.04              | 5.01      |
| 13       | 7.4   | -0.30                       | 30.00                  | 4.70              | 4.71      |
| 14       | 7.4   | -0.30                       | 210.00                 | 4.06              | 4.05      |
| 15       | 7.4   | -0.30                       | 120.00                 | 5.51              | 5.50      |
| 16       | 7.4   | -0.30                       | 120.00                 | 5.44              | 5.50      |
| 17       | 7.4   | -0.30                       | 120.00                 | 5.48              | 5.50      |
| 18       | 7.4   | -0.30                       | 120.00                 | 5.52              | 5.50      |
| 19       | 7.4   | -0.30                       | 120.00                 | 5.54              | 5.50      |
| 20       | 7.4   | -0.30                       | 120.00                 | 5.51              | 5.50      |

**Table S2.** ANOVA table of the response surface quadratic model.

| Source                 | Sum of Squares | Degree of Freedom | Mean Square | F - value | Prob > F | Significant     |
|------------------------|----------------|-------------------|-------------|-----------|----------|-----------------|
| <b>Model</b>           | 14.78          | 9                 | 1.64        | 1108.75   | < 0.0001 | Significant     |
| <b>A</b>               | 0.40           | 1                 | 0.40        | 267.38    | < 0.0001 | Significant     |
| <b>B</b>               | 0.32           | 1                 | 0.32        | 213.90    | < 0.0001 | Significant     |
| <b>C</b>               | 1.12           | 1                 | 1.12        | 753.12    | < 0.0001 | Significant     |
| <b>A<sup>2</sup></b>   | 0.070          | 1                 | 0.070       | 47.04     | 0.0001   | Significant     |
| <b>B<sup>2</sup></b>   | 0.14           | 1                 | 0.14        | 97.32     | < 0.0001 | Significant     |
| <b>C<sup>2</sup></b>   | 1.88           | 1                 | 1.88        | 1270.28   | < 0.0001 | Significant     |
| <b>AB</b>              | 0.054          | 1                 | 0.054       | 36.76     | 0.0003   | Significant     |
| <b>AC</b>              | 1.73           | 1                 | 1.73        | 1167.80   | < 0.0001 | Significant     |
| <b>BC</b>              | 0.018          | 1                 | 0.018       | 12.19     | 0.0082   | Significant     |
| <b>Residual</b>        | 0.012          | 8                 | 0.00148     |           |          |                 |
| <b>Lack of Fit</b>     | 0.00565        | 3                 | 0.00188     | 1.52      | 0.3180   | Not significant |
| <b>Pure Error</b>      | 0.00620        | 5                 | 0.00124     |           |          |                 |
| <b>Corrected Total</b> | 14.79          | 17                |             |           |          |                 |

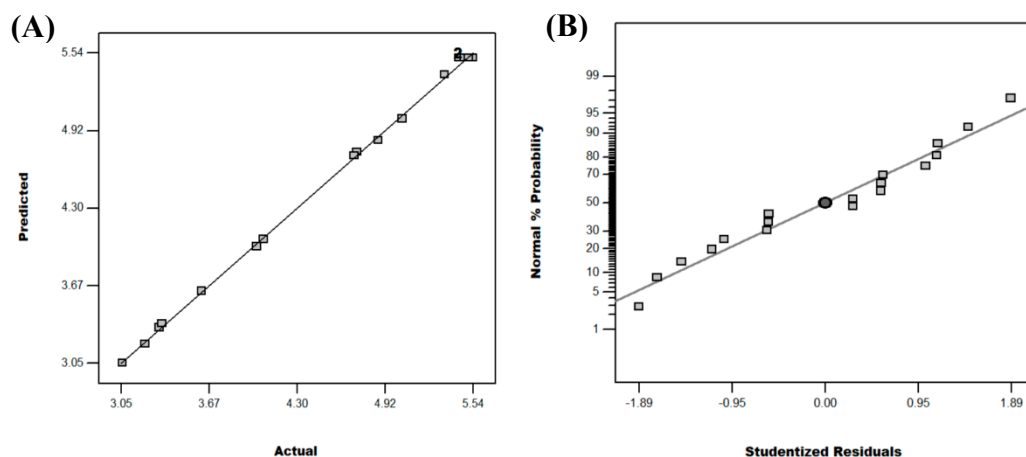

**Figure S1.** (A) Plot of the predicted versus actual correlation of the two values and (B) Normal probability plot of the residual for peak current magnitude of uric acid detection by mp20@ZIF-8/rGO/SPCE.

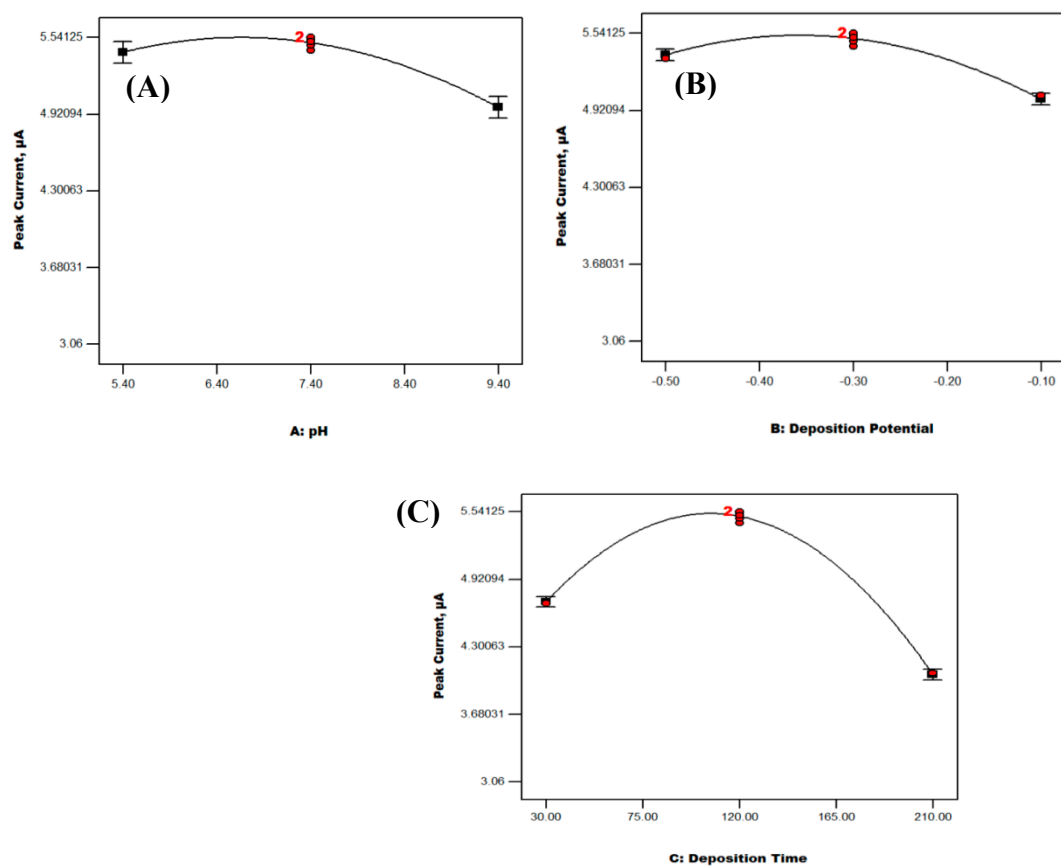

**Figure S2.** One factor plot of peak current magnitude as a function of (A) pH (at deposition potential =  $-0.3\text{ V}$ ; deposition potential =  $120\text{ s}$ ); (B) deposition potential of uric acid (pH =  $7.4$ ; deposition time =  $120\text{ s}$ ); and (C) deposition time of uric acid (pH =  $7.4$ ; deposition potential =  $-0.30\text{ V}$ ).

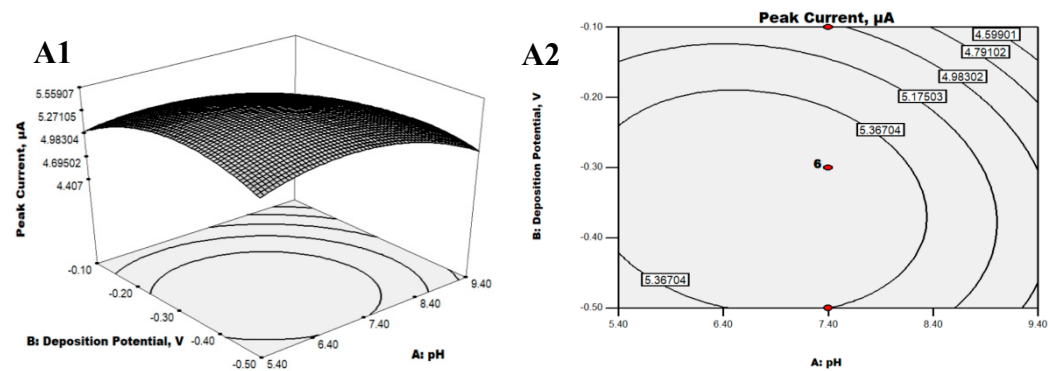

(A)

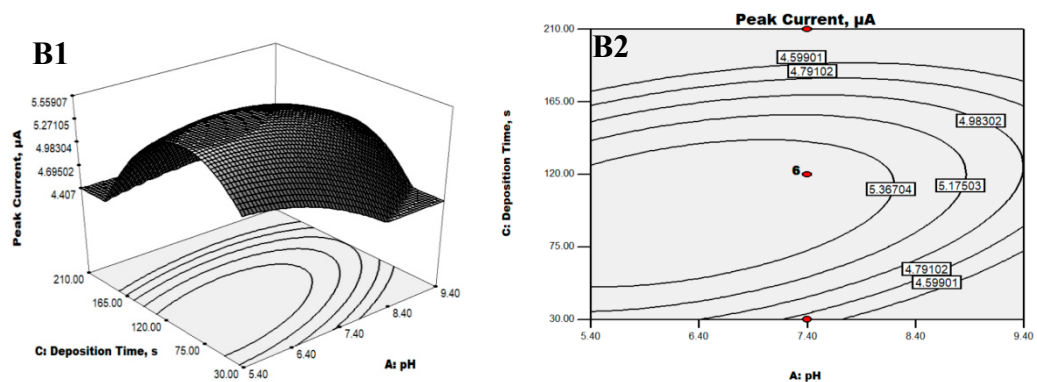

(B)

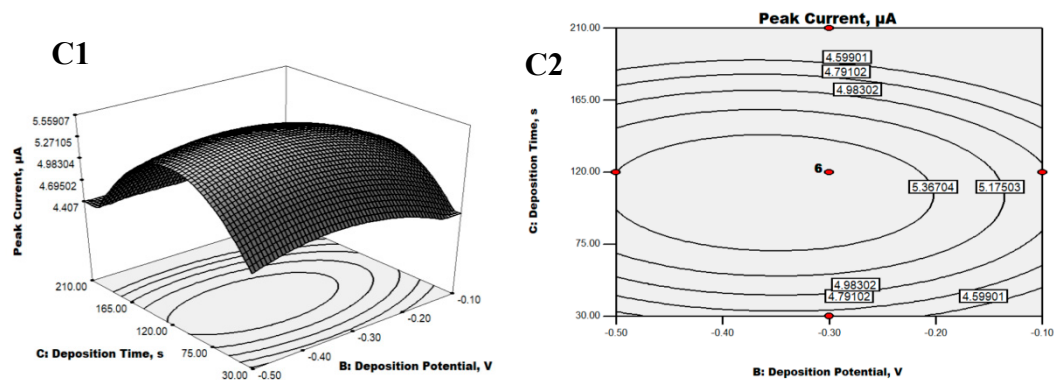

(C)

**Figure S3.** 3D surface and 2D contour plots of peak current as a function of (A) pH and deposition potential, (B) pH and deposition time, and (C) deposition potential and deposition time.

**Table S3.** Constraints applied for the optimization of the peak current of uric acid detection by mp20@ZIF-8/rGO/SPCE

| Variables                   | Goal            | Limit |        |
|-----------------------------|-----------------|-------|--------|
|                             |                 | Lower | Upper  |
| pH                          | is target = 7.4 | 5.4   | 9.4    |
| Deposition Potential , V    | is in range     | −0.50 | −0.10  |
| Deposition Time, s          | minimize        | 30.00 | 210.00 |
| Peak Current, $\mu\text{A}$ | maximize        | 3.06  | 5.54   |

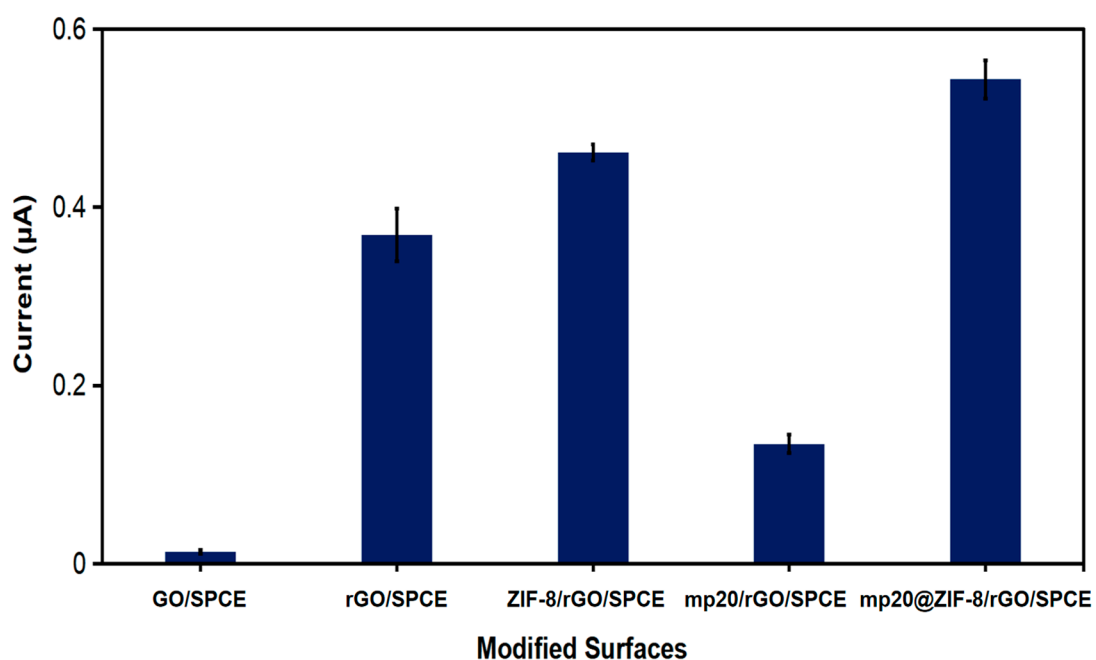

**Figure S4.** Comparative study of different modified surfaces towards the detection of 1  $\mu\text{M}$  uric acid in 0.1 M PBS solution at pH 7.4.

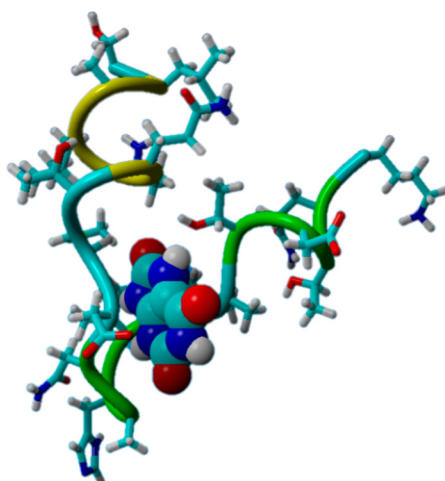

| <i>Peptide</i> | <i>Contacting Residue</i>                        |
|----------------|--------------------------------------------------|
| mp20           | Val13, Val14, Ala15, <b>Thr18</b> , <b>Gln19</b> |

**Figure S5.** Predicted interaction between mp20 with target analyte uric acid (colored balls) and contacting residues of peptide involved. Residues that form hydrogen bonds with uric acid are indicated in bold.

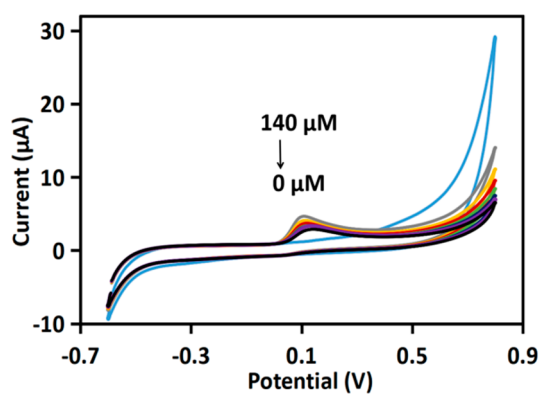

**Figure S6.** CV curves of the mp20@ZIF-8/rGO/SPCE biosensor after spiking of different uric acid concentrations in 0.1 M PBS (pH 7.4) at scan rate of 100 mV/s.

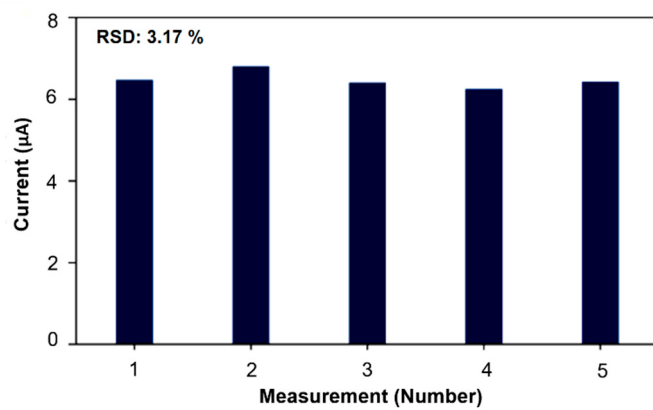

**Figure S7.** The reproducibility study of mp20@ZIF-8/rGO/SPCE in the detection of 26  $\mu\text{M}$  uric acid.
